# Supplementary material
Source: PubMed Central journal article supplement (PMC8567107)
Supplement: NIHMS1652108-supplement-supplementary_file.pdf [file NIHMS1652108-supplement-supplementary_file.pdf]

## SUPPLEMENTARY INFORMATION

**Table S1.** Distribution of first-, second- and third-division metaphases among 1,000 cells in 48-, 52-, and 72-h cultures from two donors.

**Table S2.** Observed frequency of different arm cohesion phenotypes before and after synchronization.

**Table S3.** RABiT-II DCA yields after in vitro  $\gamma$ -ray irradiation of blood samples derived from four healthy individuals (scored automatically using FluorQuantDic version 3.3).

**Table S4.** Classical DCA yields and intercellular distribution of dicentric aberrations after in vitro  $\gamma$ -ray irradiation of blood samples derived from four healthy individuals (scored manually).

**Fig. S1.** Representative images of chromosome spreads obtained from asynchronously growing blood cells arrested in metaphase by colcemid. A variety of chromosomal configurations are observed in different metaphases. Panel A: DNA strands are weakly condensed. Panel B: Progressively condensed chromosomes with long length; chromosome arms keep firm connection. Panel C: Arms begin to open due to cleavage and release of cohesin. Panel D: Chromosomes begin to shorten in length by condensing. Panel E: Chromosomes become very short, arms are completely opened and firm connection remains only at the centromere region (“X-shape”). Panel F: Arms and centromeres are split. Panel G: Other phases. (Inserts are published and modified, with permission, from: Rieder CL, Palazzo RE. Colcemid and the mitotic cycle. J Cell Sci 1992; 102 Pt 3:387–92). White dashed boxes are cropped chromosomes used for Fig. 6A.

**Fig. S2.** Representative examples of chromosome clusters that lead to errors at low doses.

| metaphases in        | 48 hrs culture |            |           | 52 hrs culture |            |           | 72 hrs culture |             |             |
|----------------------|----------------|------------|-----------|----------------|------------|-----------|----------------|-------------|-------------|
|                      | 1st cycle      | 2nd cycle  | 3rd cycle | 1st cycle      | 2nd cycle  | 3rd cycle | 1st cycle      | 2nd cycle   | 3rd cycle   |
| Donor 1 (female, 30) | 1049 (99.8%)   | 2 (0.2%)   | 0 (0%)    | 870 (93.4%)    | 61 (6.6%)  | 0 (0%)    | 349 (36.6%)    | 502 (52.6%) | 103 (10.8%) |
| Donor 2 (male, 35)   | 987 (100%)     | 0 (0%)     | 0 (0%)    | 948 (94.3%)    | 57 (5.7%)  | 0 (0%)    | 401 (41.1%)    | 494 (50.6%) | 81 (8.3%)   |
| <i>average, %</i>    | <b>99.9</b>    | <b>0.1</b> | <b>0</b>  | <b>93.9</b>    | <b>6.2</b> | <b>0</b>  | <b>38.9</b>    | <b>51.6</b> | <b>9.6</b>  |

**Supplementary Table S1**

| <b>Cohesion<br/>phenotype</b> | <b>Asynchronized</b> |             | <b>Synchronized</b> |             |
|-------------------------------|----------------------|-------------|---------------------|-------------|
|                               | <b>0Gy</b>           | <b>10Gy</b> | <b>0Gy</b>          | <b>10Gy</b> |
| <b>Undetectable</b>           | 5                    | 8           | 1                   | 7           |
| <b>Arm-closed</b>             | 30                   | 34          | 87                  | 89          |
| <b>Arm-opened</b>             | 62                   | 47          | 12                  | 4           |
| <b>Unpaired</b>               | 3                    | 11          | 0                   | 0           |
| <i>% Total</i>                | <b>100</b>           | <b>100</b>  | <b>100</b>          | <b>100</b>  |

**Supplementary Table S2**

| <b>Dose<br/>(Gy)</b> | <b>Donor</b> | <b>Chromosomes</b> | <b>DC</b>  | <b><i>Y ± SE</i></b>        |
|----------------------|--------------|--------------------|------------|-----------------------------|
| 0                    | 1            | 1587               | 9          | 0.006                       |
|                      | 2            | 1414               | 18         | 0.009                       |
|                      | 3            | 1337               | 32         | 0.022                       |
|                      | 4            | 659                | 18         | 0.018                       |
|                      | <b>Total</b> | <b>4997</b>        | <b>77</b>  | <b><i>0.015 ± 0.002</i></b> |
| 2.0                  | 1            | 1022               | 15         | 0.012                       |
|                      | 2            | 1110               | 13         | 0.009                       |
|                      | 3            | 1961               | 31         | 0.013                       |
|                      | 4            | 1600               | 34         | 0.014                       |
|                      | <b>Total</b> | <b>5693</b>        | <b>93</b>  | <b><i>0.016 ± 0.002</i></b> |
| 4.0                  | 1            | 1090               | 30         | 0.026                       |
|                      | 2            | 1290               | 28         | 0.019                       |
|                      | 3            | 1735               | 39         | 0.018                       |
|                      | 4            | 764                | 45         | 0.033                       |
|                      | <b>Total</b> | <b>4879</b>        | <b>142</b> | <b><i>0.029 ± 0.002</i></b> |
| 6.0                  | 1            | 1263               | 46         | 0.033                       |
|                      | 2            | 1029               | 42         | 0.038                       |
|                      | 3            | 1343               | 55         | 0.038                       |
|                      | 4            | 1644               | 84         | 0.046                       |
|                      | <b>Total</b> | <b>5279</b>        | <b>227</b> | <b><i>0.043 ± 0.003</i></b> |
| 8.0                  | 1            | 657                | 43         | 0.056                       |
|                      | 2            | 951                | 48         | 0.047                       |
|                      | 3            | 1308               | 77         | 0.053                       |
|                      | 4            | 1210               | 87         | 0.061                       |
|                      | <b>Total</b> | <b>4126</b>        | <b>255</b> | <b><i>0.062 ± 0.004</i></b> |
| 10.0                 | 1            | 562                | 40         | 0.068                       |
|                      | 2            | 893                | 52         | 0.055                       |
|                      | 3            | 963                | 86         | 0.087                       |
|                      | 4            | 644                | 73         | 0.109                       |
|                      | <b>Total</b> | <b>3062</b>        | <b>251</b> | <b><i>0.082 ± 0.005</i></b> |

**Supplementary Table S3**

| Dose<br>(Gy) | Donor        | Cells      | Distribution of dicentrics |            |           |           |           |           |           |           |           |          |          | Y ± SE   |          |                      |
|--------------|--------------|------------|----------------------------|------------|-----------|-----------|-----------|-----------|-----------|-----------|-----------|----------|----------|----------|----------|----------------------|
|              |              |            | DC                         | D0         | D1        | D2        | D3        | D4        | D5        | D6        | D7        | D8       | D9       |          |          |                      |
| 0            | 1            | 50         | 0                          | 50         | 0         | 0         | 0         | 0         | 0         | 0         | 0         | 0        | 0        | 0        | 0        | 0.000                |
|              | 2            | 50         | 0                          | 50         | 0         | 0         | 0         | 0         | 0         | 0         | 0         | 0        | 0        | 0        | 0        | 0.000                |
|              | 3            | 50         | 0                          | 50         | 0         | 0         | 0         | 0         | 0         | 0         | 0         | 0        | 0        | 0        | 0        | 0.000                |
|              | 4            | 50         | 0                          | 50         | 0         | 0         | 0         | 0         | 0         | 0         | 0         | 0        | 0        | 0        | 0        | 0.000                |
|              | <b>Total</b> | <b>200</b> | <b>0</b>                   | <b>200</b> | <b>0</b>  | <b>0</b> | <b>0</b> | <b>0</b> | <b>0</b> | <b>0.000 ± 0.000</b> |
| 2.0          | 1            | 50         | 14                         | 37         | 12        | 1         | 0         | 0         | 0         | 0         | 0         | 0        | 0        | 0        | 0        | 0.280                |
|              | 2            | 50         | 13                         | 37         | 13        | 0         | 0         | 0         | 0         | 0         | 0         | 0        | 0        | 0        | 0        | 0.260                |
|              | 3            | 50         | 8                          | 42         | 8         | 0         | 0         | 0         | 0         | 0         | 0         | 0        | 0        | 0        | 0        | 0.160                |
|              | 4            | 50         | 18                         | 34         | 14        | 2         | 0         | 0         | 0         | 0         | 0         | 0        | 0        | 0        | 0        | 0.360                |
|              | <b>Total</b> | <b>200</b> | <b>53</b>                  | <b>150</b> | <b>47</b> | <b>3</b>  | <b>0</b>  | <b>0</b>  | <b>0</b>  | <b>0</b>  | <b>0</b>  | <b>0</b> | <b>0</b> | <b>0</b> | <b>0</b> | <b>0.265 ± 0.036</b> |
| 4.0          | 1            | 50         | 57                         | 16         | 19        | 9         | 4         | 2         | 0         | 0         | 0         | 0        | 0        | 0        | 0        | 1.140                |
|              | 2            | 50         | 54                         | 19         | 16        | 8         | 6         | 1         | 0         | 0         | 0         | 0        | 0        | 0        | 0        | 1.080                |
|              | 3            | 50         | 32                         | 26         | 18        | 4         | 2         | 0         | 0         | 0         | 0         | 0        | 0        | 0        | 0        | 0.640                |
|              | 4            | 50         | 45                         | 20         | 17        | 11        | 2         | 0         | 0         | 0         | 0         | 0        | 0        | 0        | 0        | 0.900                |
|              | <b>Total</b> | <b>200</b> | <b>188</b>                 | <b>81</b>  | <b>70</b> | <b>32</b> | <b>14</b> | <b>3</b>  | <b>0</b>  | <b>0</b>  | <b>0</b>  | <b>0</b> | <b>0</b> | <b>0</b> | <b>0</b> | <b>0.940 ± 0.069</b> |
| 6.0          | 1            | 50         | 101                        | 4          | 11        | 20        | 12        | 2         | 0         | 1         | 0         | 0        | 0        | 0        | 0        | 2.020                |
|              | 2            | 50         | 92                         | 7          | 17        | 13        | 8         | 0         | 5         | 0         | 0         | 0        | 0        | 0        | 0        | 1.840                |
|              | 3            | 50         | 87                         | 5          | 17        | 18        | 8         | 1         | 0         | 1         | 0         | 0        | 0        | 0        | 0        | 1.740                |
|              | 4            | 50         | 102                        | 3          | 15        | 19        | 7         | 4         | 1         | 0         | 1         | 0        | 0        | 0        | 0        | 2.040                |
|              | <b>Total</b> | <b>200</b> | <b>382</b>                 | <b>19</b>  | <b>60</b> | <b>70</b> | <b>35</b> | <b>7</b>  | <b>6</b>  | <b>2</b>  | <b>1</b>  | <b>0</b> | <b>0</b> | <b>0</b> | <b>0</b> | <b>1.910 ± 0.098</b> |
| 8.0          | 1            | 50         | 129                        | 5          | 8         | 15        | 8         | 7         | 5         | 1         | 0         | 1        | 0        | 0        | 0        | 2.580                |
|              | 2            | 50         | 141                        | 1          | 9         | 10        | 17        | 7         | 4         | 1         | 1         | 0        | 0        | 0        | 0        | 2.820                |
|              | 3            | 50         | 114                        | 9          | 6         | 12        | 14        | 5         | 2         | 2         | 0         | 0        | 0        | 0        | 0        | 2.280                |
|              | 4            | 50         | 142                        | 3          | 7         | 11        | 13        | 9         | 4         | 3         | 0         | 0        | 0        | 0        | 0        | 2.840                |
|              | <b>Total</b> | <b>200</b> | <b>526</b>                 | <b>18</b>  | <b>30</b> | <b>48</b> | <b>52</b> | <b>28</b> | <b>15</b> | <b>7</b>  | <b>1</b>  | <b>1</b> | <b>0</b> | <b>0</b> | <b>0</b> | <b>2.630 ± 0.115</b> |
| 10.0         | 1            | 50         | 205                        | 0          | 2         | 10        | 9         | 8         | 7         | 10        | 3         | 1        | 0        | 0        | 0        | 4.100                |
|              | 2            | 50         | 210                        | 0          | 2         | 5         | 8         | 12        | 17        | 3         | 1         | 2        | 0        | 0        | 0        | 4.200                |
|              | 3            | 50         | 153                        | 2          | 3         | 15        | 16        | 6         | 3         | 2         | 3         | 0        | 0        | 0        | 0        | 3.060                |
|              | 4            | 50         | 221                        | 0          | 0         | 3         | 12        | 12        | 15        | 3         | 3         | 1        | 1        | 0        | 0        | 4.420                |
|              | <b>Total</b> | <b>200</b> | <b>789</b>                 | <b>2</b>   | <b>7</b>  | <b>33</b> | <b>45</b> | <b>38</b> | <b>42</b> | <b>18</b> | <b>10</b> | <b>4</b> | <b>1</b> | <b>0</b> | <b>0</b> | <b>3.940 ± 0.140</b> |

Supplementary Table S4

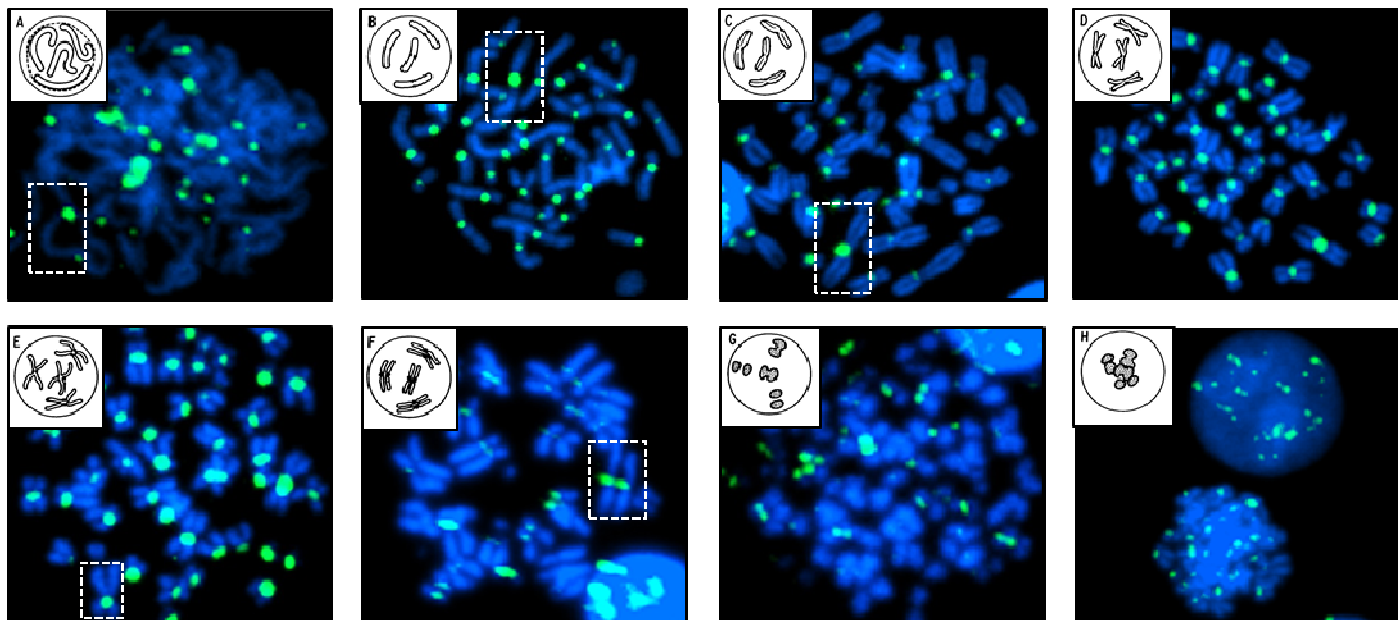

Supplementary Figure S1.

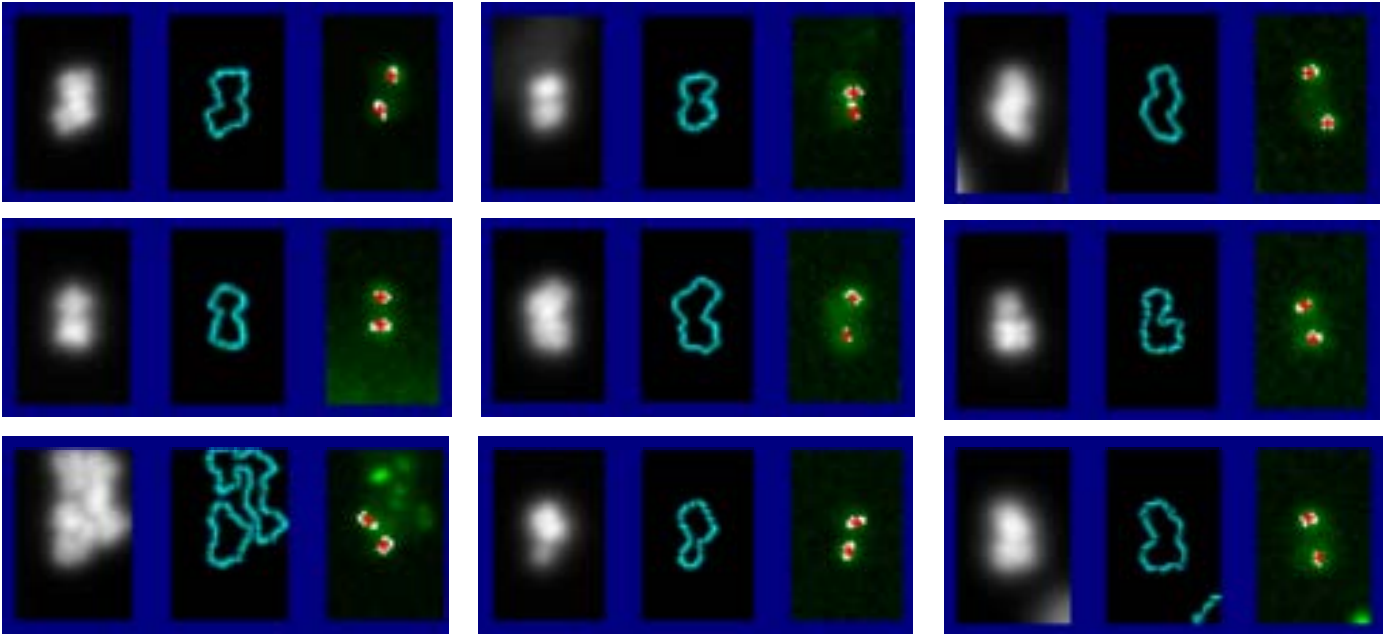

Supplementary Figure S2.
